# Supplementary material
Source: PubMed Central journal article supplement (PMC6583756)
Supplement: jamadermatol-154-1447-s003.pdf [file jamadermatol-154-1447-s003.pdf]

## Data Sharing Statement

Alam. Effect of Platelet-Rich Plasma Injection for Rejuvenation of Photoaged Facial Skin. *JAMA Dermatol*. Published November 07, 2018. 10.1001/jamadermatol.2018.3977

### Data

**Data available:** No
